# Supplementary material for: A 20-year record (1998–2017) of permafrost, active layer and meteorological conditions at a high Arctic permafrost research site (Bayelva, Spitsbergen)
Source: Copernicus journal article supplement (doi:10.5194/essd-10-355-2018), 2018-03-05
Supplement: Supplementary file 1 [file essd-10-355-2018-supplement.zip]

**These dataset and metadata have been published in the following publication. If you use this dataset, please cite the final publication of:**

Boike, J., Juszak, I., Lange, S., Chadburn, S., Burke, E., Overduin, P. P., Roth, K., Ippisch, O., Bornemann, N., Stern, L., Gouttevin, I., Hauber, E., and Westermann, S.: A 20-year record (1998–2017) of permafrost, active layer, and meteorological conditions at a High Arctic permafrost research site (Bayelva, Spitsbergen): an opportunity to validate remote sensing data and land surface, snow, and permafrost models, Earth Syst. Sci. Data Discuss., <https://doi.org/10.5194/essd-2017-100>, in review, 2017.

## Dataset Bayelva

**The following tables give details on the Bayelva data.**

**Table 1. Variables with column name and unit**

| variable                             | column name               | unit              |
|--------------------------------------|---------------------------|-------------------|
| air/snow temperature                 | Tair_(height in cm)       | °C                |
| relative humidity                    | RH_(height in cm)         | %                 |
| incoming shortwave radiation         | SwIn                      | W m <sup>-2</sup> |
| outgoing shortwave radiation         | SwOut                     | W m <sup>-2</sup> |
| incoming longwave radiation          | LwIn                      | W m <sup>-2</sup> |
| outgoing longwave radiation          | LwOut                     | W m <sup>-2</sup> |
| net radiation                        | RadNet                    | W m <sup>-2</sup> |
| wind speed                           | Vwind_(height in cm)      | m s <sup>-1</sup> |
| wind direction                       | Dirwind_(height in cm)    | °                 |
| wind direction standard deviation    | Dirwind_sd_(height in cm) | °                 |
| soil/permafrost temperature          | Ts_(depth in cm)          | °C                |
| soil bulk electrical conductivity    | Cond_(depth in cm)        | S m <sup>-1</sup> |
| dielectric number                    | E2_(depth in cm)          | –                 |
| soil volumetric liquid water content | Vwc_(depth in cm)         | –                 |
| ground heat flux                     | G                         | W m <sup>-2</sup> |
| precipitation (liquid)               | Prec                      | mm                |
| snow depth                           | Dsn                       | m                 |

Overview of all variables provided as time series. The variables electric conductivity, dielectric number, soil temperature, and volumetric soil liquid water content include a second number or letter in the column name. In these cases, the first number is the distance in the 2D profile and the second is the depth. The single letters [a, b, c, d] refer to the different 1D profiles. Vertically oriented probes are marked with letter [v]. Additional Level 2 data is provided for the variables snow depth, soil temperature, and volumetric soil liquid water content, which is indicated by “\_lv2” in the column names. If an air temperature sensor is covered by snow and thus measures snow temperature, this is indicated by flag 8 in the data.

**Table 2. Quality flag scale**

| flag | meaning            | description                                                                                                                                                                      |
|------|--------------------|----------------------------------------------------------------------------------------------------------------------------------------------------------------------------------|
| 0    | Good data          | All quality tests passed                                                                                                                                                         |
| 1    | No data            | Missing value                                                                                                                                                                    |
| 2    | System error       | System failure led to corrupted data, e.g. when the power supply broke down, sensors were removed from their proper location, sensors broke or the data logger saved error codes |
| 3    | Maintenance        | Values influenced by the installation, calibration and cleaning of sensors or programming of the data logger; information from field protocols of engineers                      |
| 4    | Physical limits    | Values outside the physically possible or likely limits, e.g. relative humidity should be in a range of 0-100%                                                                   |
| 5    | Gradient           | Values unlikely because of prolonged constant periods or high/low spikes; test within each single series                                                                         |
| 6    | Plausibility       | Values unlikely in comparison with other series or for a given time of the year; flagged manually by engineers                                                                   |
| 7    | Decreased accuracy | Values with decreased sensor accuracy, e.g. identified when thawing soil does not have a temperature of 0°C                                                                      |
| 8    | Snow covered       | Good data, but the sensor is snow covered                                                                                                                                        |

Description quality control for data flags. Most flags are run automatically, few are done manually (for example, 3-maintenance, 6-plausibility).

**Table 3. Soil temperatures and volumetric water content level2 product**

| <b>1998-2012</b> | <b>2009-current</b> | <b>LV2</b> |
|------------------|---------------------|------------|
| Ts_a_145_6       | Ts_c_1              | Ts_lv2_4   |
| Ts_a_169_9       | Ts_c_11             | Ts_lv2_10  |
| Ts_a_124_25      | Ts_c_21             | Ts_lv2_23  |
| Ts_a_145_40      | Ts_c_37             | Ts_lv2_39  |
| Ts_a_145_62      | Ts_c_55             | Ts_lv2_59  |
| Ts_a_151_76      | Ts_c_71             | Ts_lv2_74  |
| Ts_a_145_99      | Ts_c_89             | Ts_lv2_94  |
| Ts_a_135_125_v   | Ts_c_141            | Ts_lv2_133 |
| Vwc_140_6        | Vwc_c_1             | Vwc_lv2_4  |
| Vwc_174_8        | Vwc_c_11            | Vwc_lv2_10 |
| Vwc_115_22       | Vwc_c_21            | Vwc_lv2_22 |
| Vwc_140_39       | Vwc_c_37            | Vwc_lv2_38 |
| Vwc_140_62       | Vwc_c_55            | Vwc_lv2_59 |
| Vwc_146_76       | Vwc_c_71            | Vwc_lv2_74 |
| Vwc_95_99        | Vwc_c_89            | Vwc_lv2_94 |

The data has not been changed in any way (e.g. no interpolation or regression). The choice of data series was based on the following criteria: a) same surface type (mud boil), in particular for sensors close to the surface; this is given for the soil sensors with x (first value followed by depth), b)  $R^2 \sim 1$  and regression slope  $\sim 1$  and offset  $\sim 0^\circ\text{C}$  during the overlapping period 2009-2012 between old (1998-2009) and new station (2009-current), c) no obvious sensor drift, zero curtain in autumn does not deviate more than  $0.3^\circ\text{C}$  from  $0^\circ\text{C}$  d) similar temperature level and variation in winter and summer during the overlapping period 2009-2012 between old and new station.
