# Supplementary material for: A 20-year record (1998–2017) of permafrost, active layer and meteorological conditions at a high Arctic permafrost research site (Bayelva, Spitsbergen)
Source: Copernicus journal article supplement (doi:10.5194/essd-10-355-2018), 2018-03-05
Supplement: Supplementary file 2 [file essd-10-355-2018-supplement.zip]

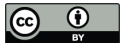

## *Supplement of*

# **A 20-year record (1998–2017) of permafrost, active layer and meteorological conditions at a high Arctic permafrost research site (Bayelva, Spitsbergen)**

**Julia Boike et al.**

*Correspondence to:* Julia Boike ([Julia.Boike@awi.de](mailto:Julia.Boike@awi.de))

- [essd-10-355-2018-supplement-title-page.pdf](#)
- [Supplement\\_ReadMe.pdf](#)
- [met\\_lv1\\_1998.dat](#)
- [met\\_lv1\\_1999.dat](#)
- [met\\_lv1\\_2000.dat](#)
- [met\\_lv1\\_2001.dat](#)
- [met\\_lv1\\_2002.dat](#)
- [met\\_lv1\\_2003.dat](#)
- [met\\_lv1\\_2004.dat](#)
- [met\\_lv1\\_2005.dat](#)
- [met\\_lv1\\_2006.dat](#)
- [met\\_lv1\\_2007.dat](#)
- [met\\_lv1\\_2008.dat](#)
- [met\\_lv1\\_2009.dat](#)
- [met\\_lv1\\_2010.dat](#)
- [met\\_lv1\\_2011.dat](#)
- [met\\_lv1\\_2012.dat](#)
- [met\\_lv1\\_2013.dat](#)

- met\_lv1\_2014.dat
- met\_lv1\_2015.dat
- met\_lv1\_2016.dat
- met\_lv1\_2017.dat
- met\_lv2.dat
- met\_lv2\_withflag.dat
- soil\_lv1\_1998.dat
- soil\_lv1\_1999.dat
- soil\_lv1\_2000.dat
- soil\_lv1\_2001.dat
- soil\_lv1\_2002.dat
- soil\_lv1\_2003.dat
- soil\_lv1\_2004.dat
- soil\_lv1\_2005.dat
- soil\_lv1\_2006.dat
- soil\_lv1\_2007.dat
- soil\_lv1\_2008.dat
- soil\_lv1\_2009.dat
- soil\_lv1\_2010.dat
- soil\_lv1\_2011.dat
- soil\_lv1\_2012.dat
- soil\_lv1\_2013.dat
- soil\_lv1\_2014.dat
- soil\_lv1\_2015.dat
- soil\_lv1\_2016.dat
- soil\_lv1\_2017.dat
- soil\_lv2.dat
- soil\_lv2\_withflag.dat

The copyright of individual parts of the supplement might differ from the CC BY 4.0 License.
